# Supplementary material for: A mononuclear ruthenium complex showing multiple proton-coupled electron transfer toward multi-electron transfer reactions
Source: Royal Society of Chemistry journal article supplement (doi:10.1039/c2dt30773a), 2012-01-01
Supplement: c2dt30773a.pdf [file c2dt30773a.pdf]

## Electronic Supporting Information

### **A Mononuclear Ruthenium Complex Showing Multiple Proton-Coupled Electron Transfer toward Multi-electron Transfer Reactions**

Masaya Okamura,<sup>a,b</sup> Masaki Yoshida,<sup>a,c</sup> Reiko Kuga,<sup>a</sup> Ken Sakai,<sup>c,d,e</sup> Mio Kondo<sup>a</sup> and Shigeyuki Masaoka<sup>\*a,b,f</sup>

<sup>a</sup> *Institute for Molecular Science, Higashiyama 5-1, Myodaiji, Okazaki 444-8787 Japan.*

<sup>b</sup> *The Graduate University for Advanced Studies[SOKENDAI], Shonan Village, Hayama, Kanagawa 240-0193 Japan*

<sup>c</sup> *Department of Chemistry, Faculty of Science, Kyushu University, Hakozaki 6-10-1, Higashi-ku, Fukuoka 812-8581, Japan.*

<sup>d</sup> *International Institute for Carbon-Neutral Energy Research (WPI-I<sup>2</sup>CNER), Kyushu University, Motooka 744, Nishi-ku, Fukuoka 819-0395, Japan.*

<sup>e</sup> *International Research Center for Molecular Systems (IRCMS), Kyushu University, Motooka 744, Nishi-ku, Fukuoka 819-0395, Japan.*

<sup>f</sup> *PRESTO, Japan Science and Technology Agency (JST), Honcho 4-1-8, Kawaguchi, Saitama 332-0012, Japan.*

*E-mail: masaoka@ims.ac.jp*

*Fax: (+81) 564-59-5589*

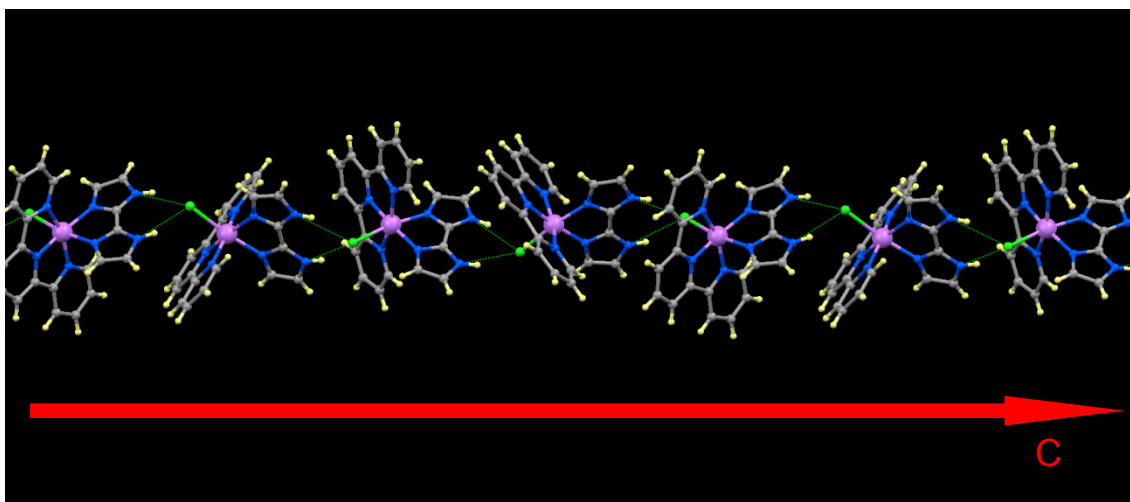

**Fig. S1.** Hydrogen-bonded one-dimensional network of the cationic moieties of **1** in the crystal.

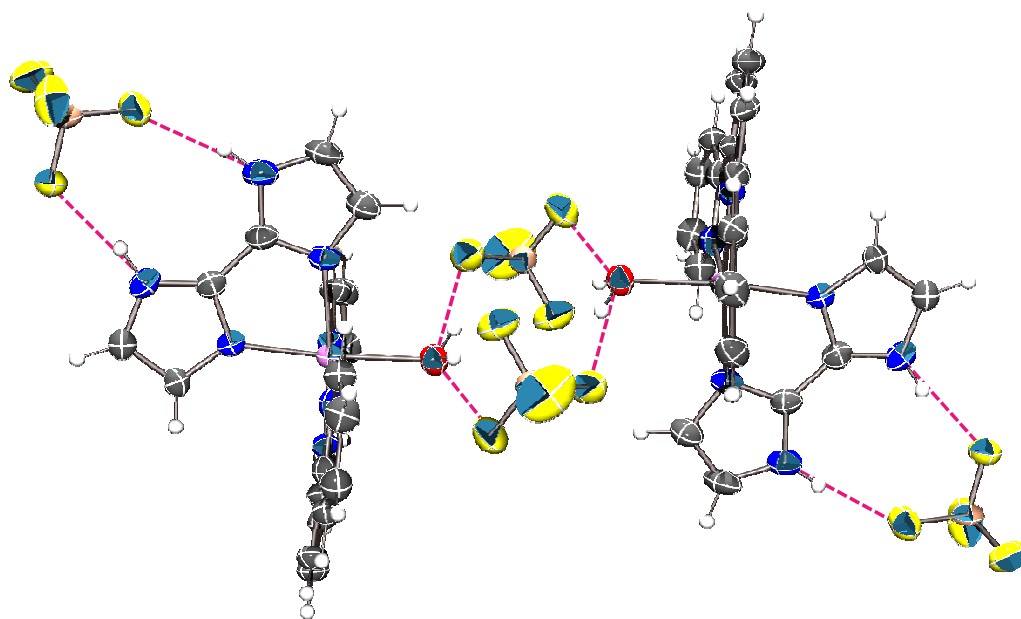

**Fig. S2.** Hydrogen-bonded dimeric structure of the complex **2'** in the crystal. Thermal ellipsoids are displayed at the 50% probability level.

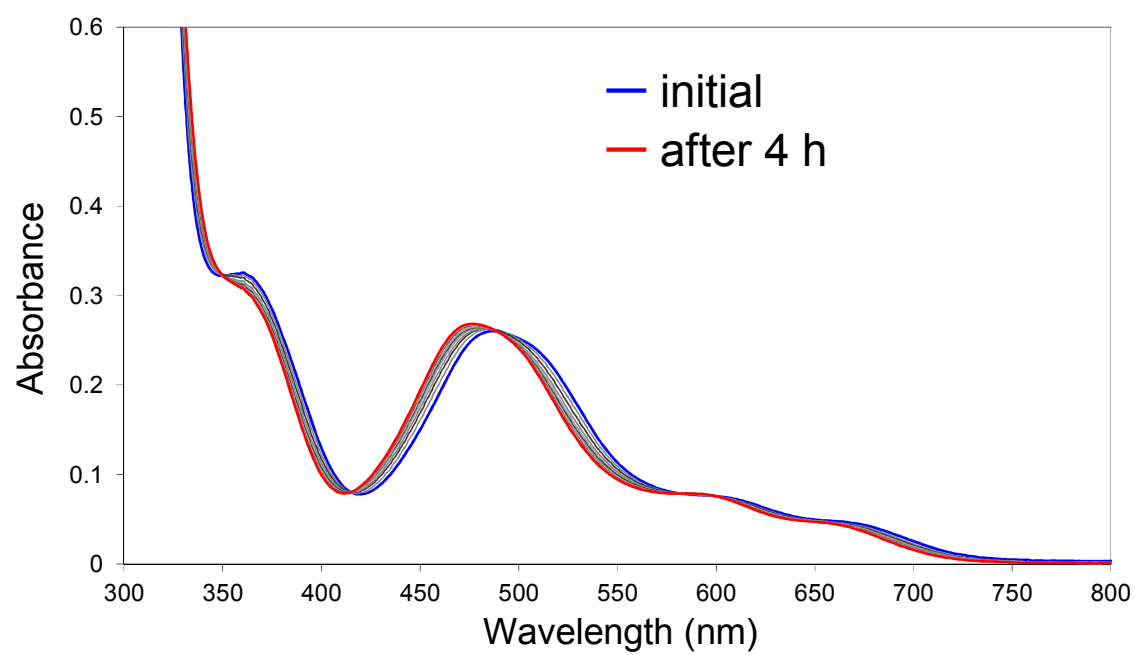

**Fig. S3.** Time course of absorption spectra after dissolution of **1** (0.5 mM) in water.

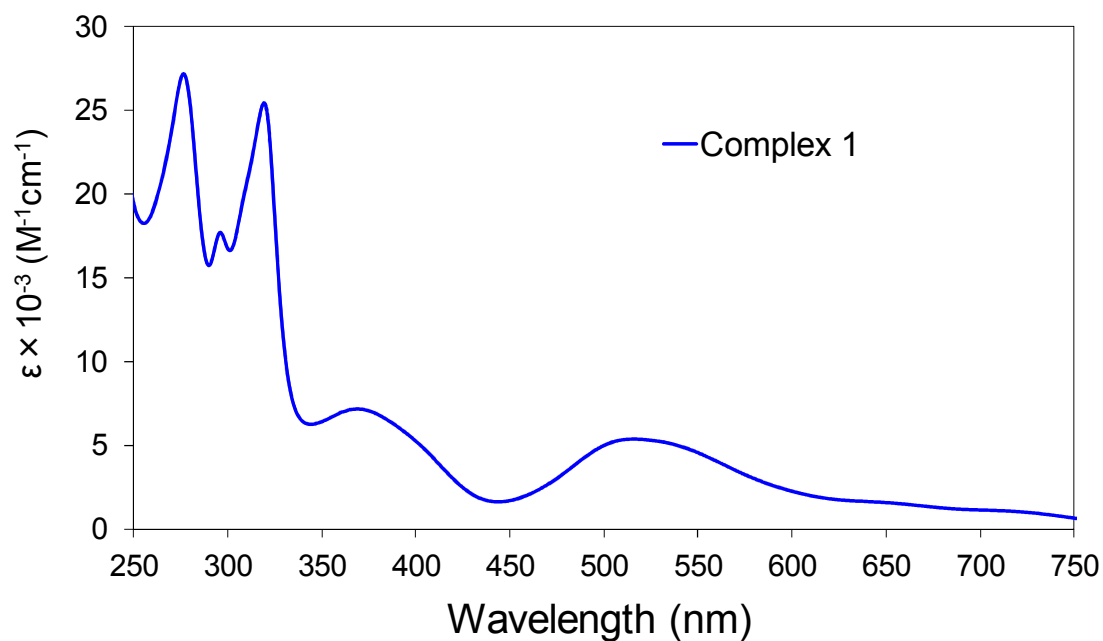

**Fig. S4.** UV-visible spectrum of an acetonitrile solution of **1** (0.5 mM).

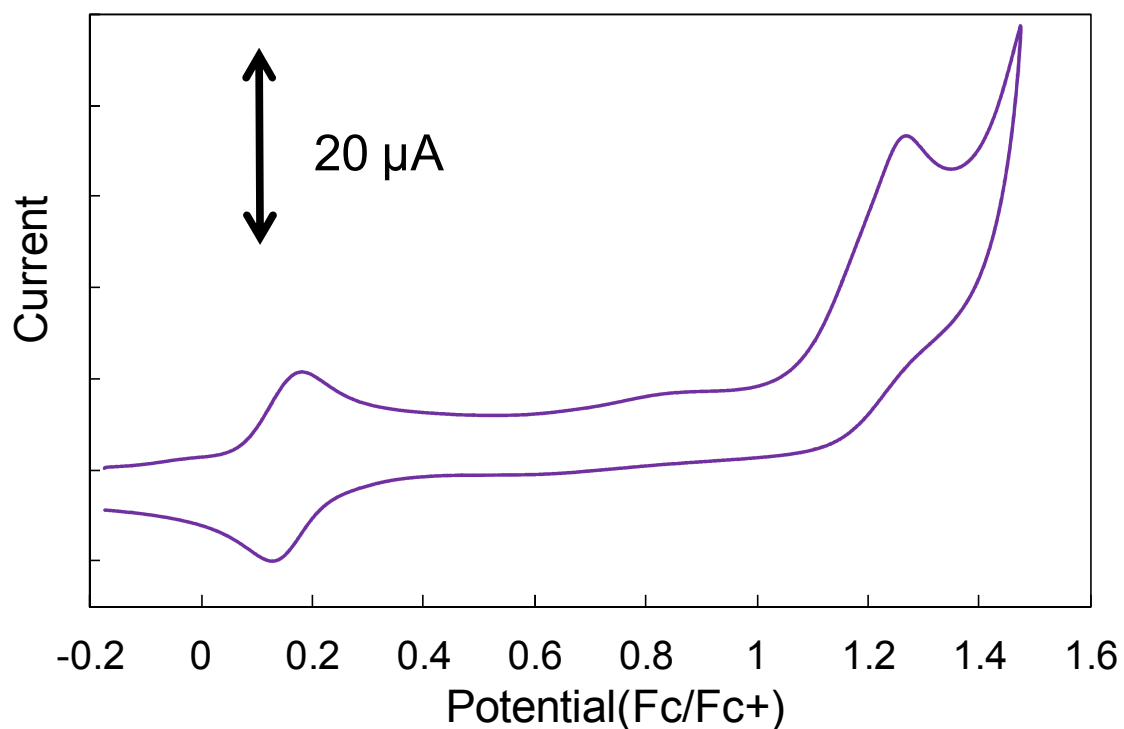

**Fig. S5.** Cyclic voltammogram of **1** (0.5 mM) in 0.1 M TBAP/acetonitrile solution under Ar atmosphere (WE: GC, CE: Pt wire, RE: SCE; Scan rate: 100 mV/s).

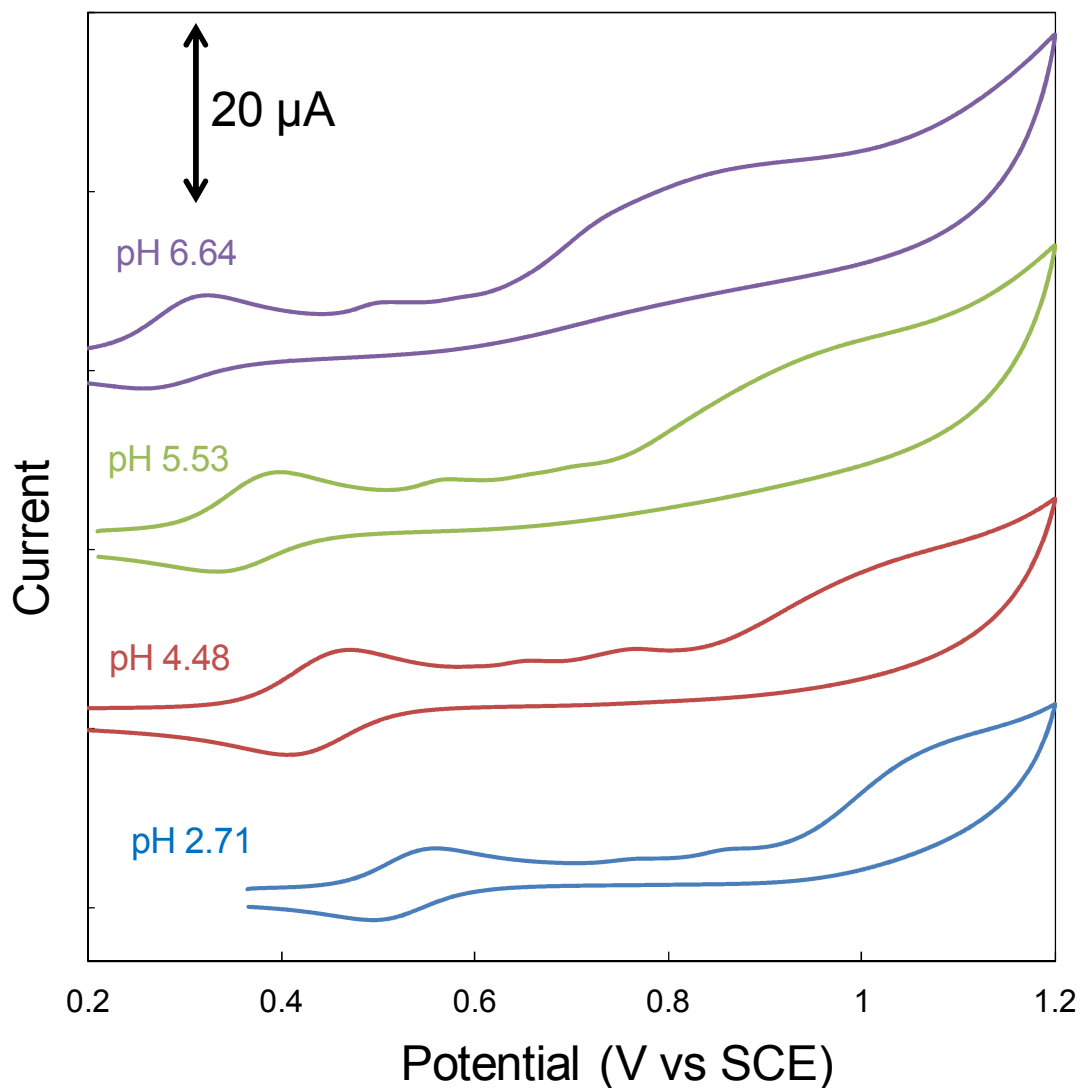

**Fig. S6.** pH-dependence of cyclic voltammograms of  $[\text{Ru}(\text{trpy})(\text{H}_2\text{bim})(\text{OH}_2)](\text{PF}_6)_2$  (0.5 mM) in aqueous solution under various pH conditions (WE : GC, CE : Pt wire, RE : SCE ; Scan rate :100 mV/s)

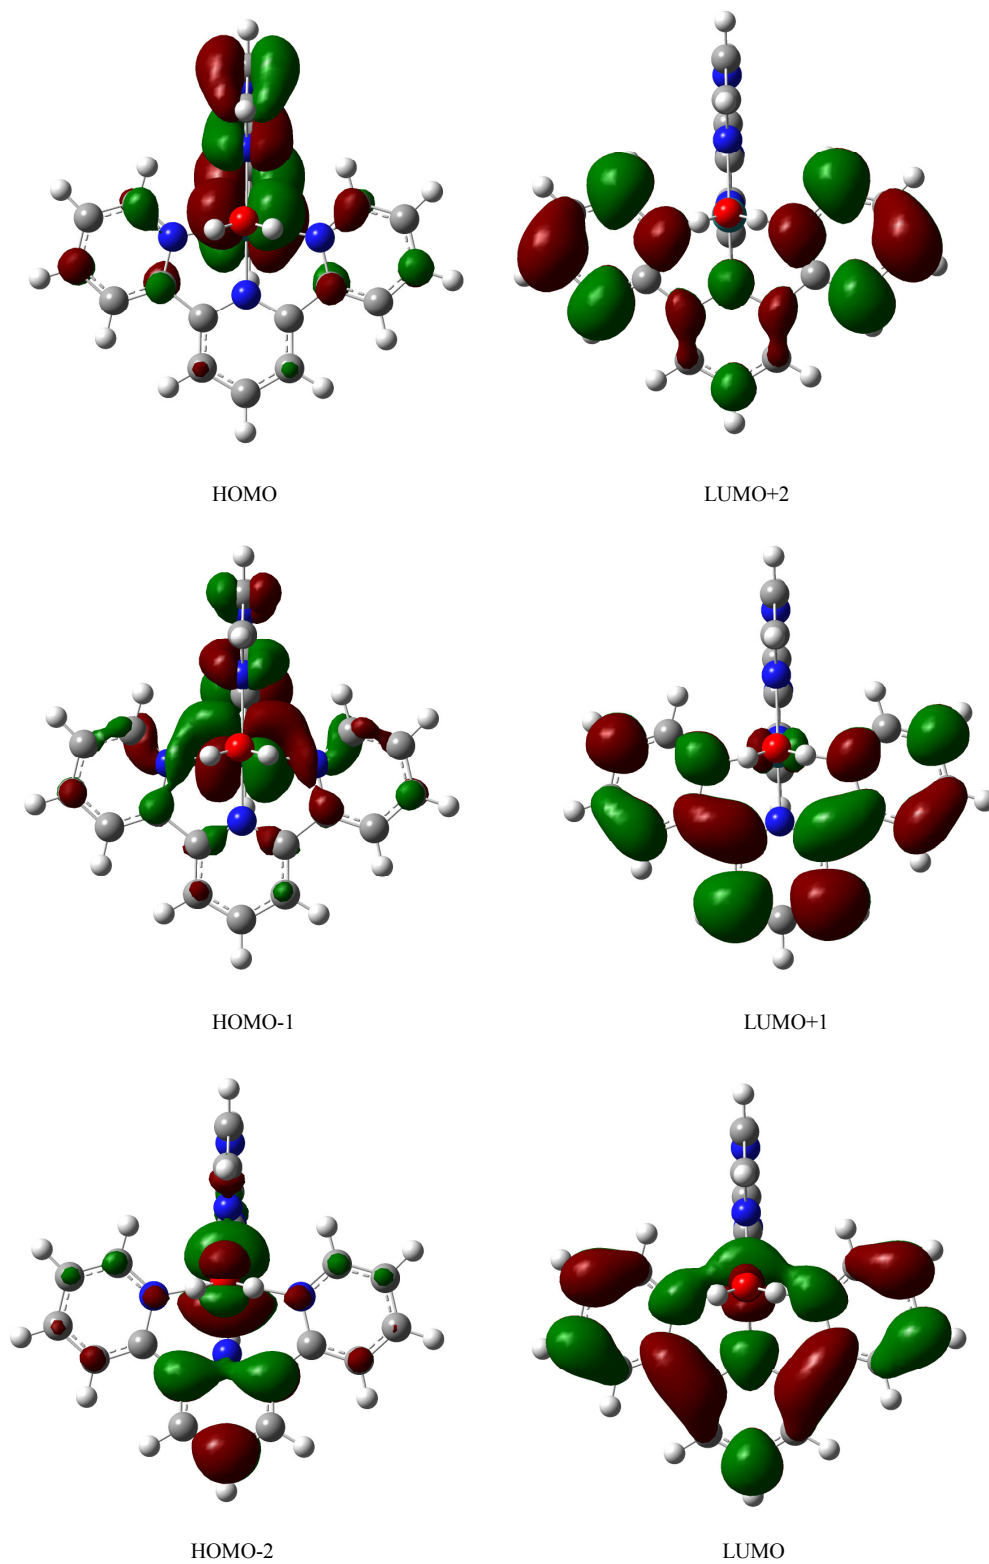

**Fig. S7.** Isodensity surface plots of selected frontier molecular orbitals of  $[\text{Ru}(\text{trpy})(\text{Hbim})(\text{OH}_2)]^+$  based on the optimized ground-state geometry.

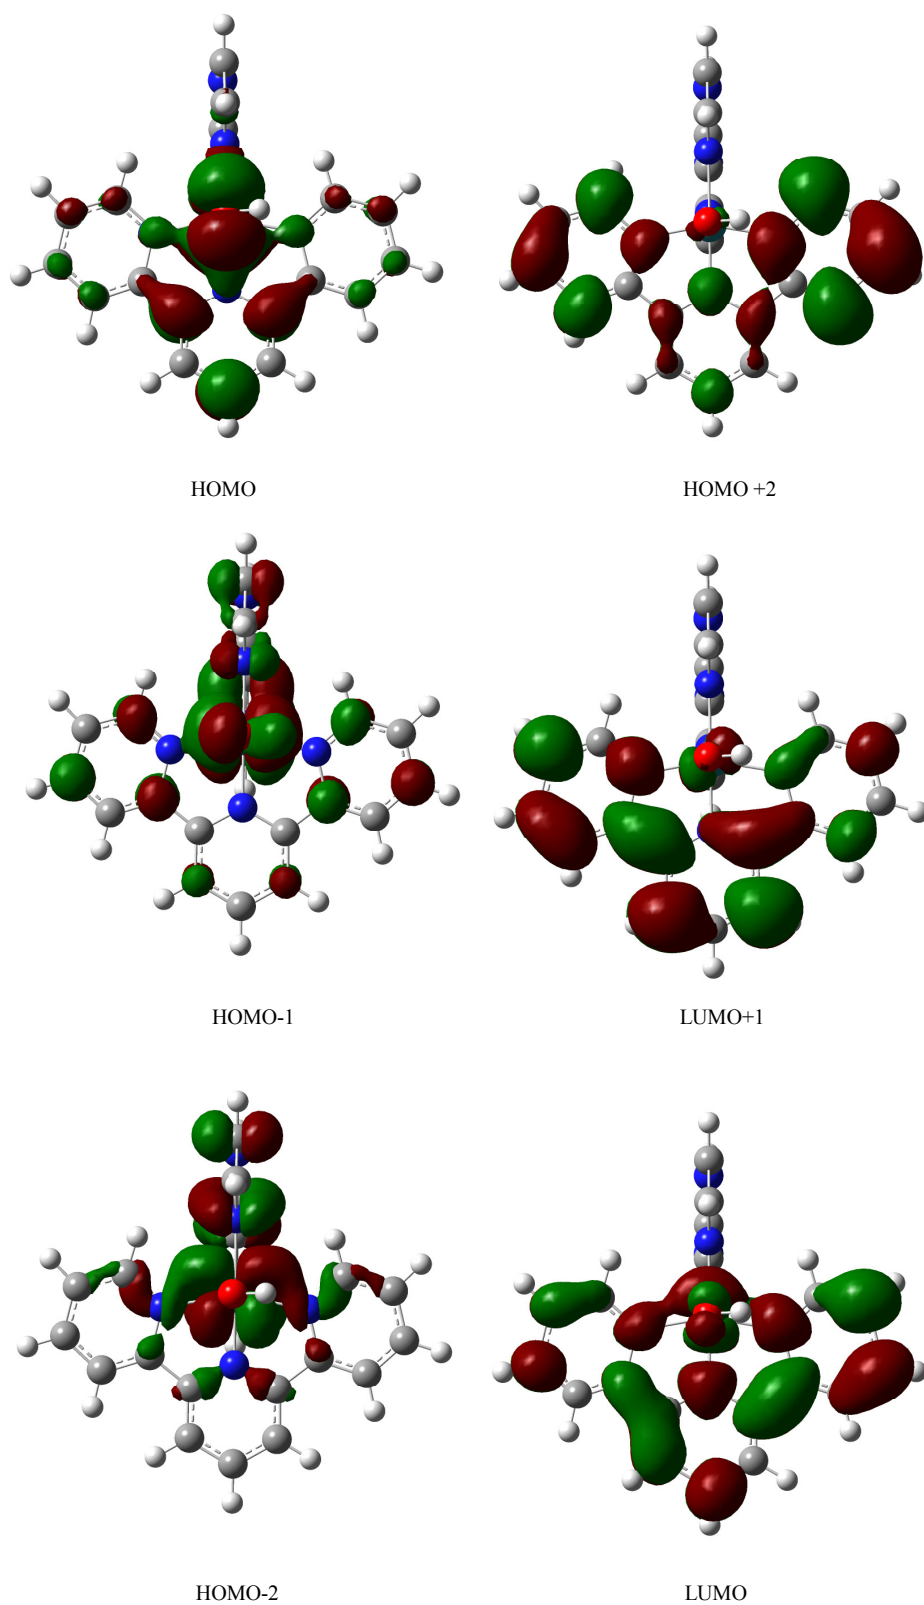

**Fig. S8.** Isodensity surface plots of selected frontier molecular orbitals of  $[\text{Ru}(\text{trpy})(\text{Hbim})(\text{OH})]^0$  based on the optimized ground-state geometry.

**Table S1.** Wavelength and oscillator strengths of both isomers at MLCT band from TD-DFT calculated absorption spectra.

| Complex                                                        | Wavelength (nm) | Oscillator strength | Transition    | CI coef  (> 0.3) |
|----------------------------------------------------------------|-----------------|---------------------|---------------|------------------|
| [Ru(trpy)(H <sub>2</sub> bim)(OH <sub>2</sub> )] <sup>2+</sup> | 466             | 0.0469              | HOMO-2→LUMO+1 | 0.68751          |
|                                                                | 442             | 0.0912              | HOMO-2→LUMO   | 0.34681          |
|                                                                |                 |                     | HOMO-1→LUMO+1 | 0.39629          |
|                                                                |                 |                     | HOMO→LUMO+1   | 0.36473          |
|                                                                | 364             | 0.0606              | HOMO-1→LUMO+2 | 0.42111          |
| HOMO→LUMO+4                                                    |                 |                     | 0.39707       |                  |
| [Ru(trpy)(Hbim)(OH <sub>2</sub> )] <sup>+</sup>                | 500             | 0.0486              | HOMO-2→LUMO+1 | 0.68547          |
|                                                                | 477             | 0.0652              | HOMO-2→LUMO   | 0.44248          |
|                                                                |                 |                     | HOMO→LUMO+1   | 0.33187          |
| 389                                                            | 0.0381          | HOMO→LUMO+2         | 0.65208       |                  |
| [Ru(trpy)(Hbim)(OH)] <sup>0</sup>                              | 660             | 0.056               | HOMO→LUMO+1   | 0.60367          |
|                                                                | 414             | 0.117               | HOMO-1→LUMO+2 | 0.66706          |

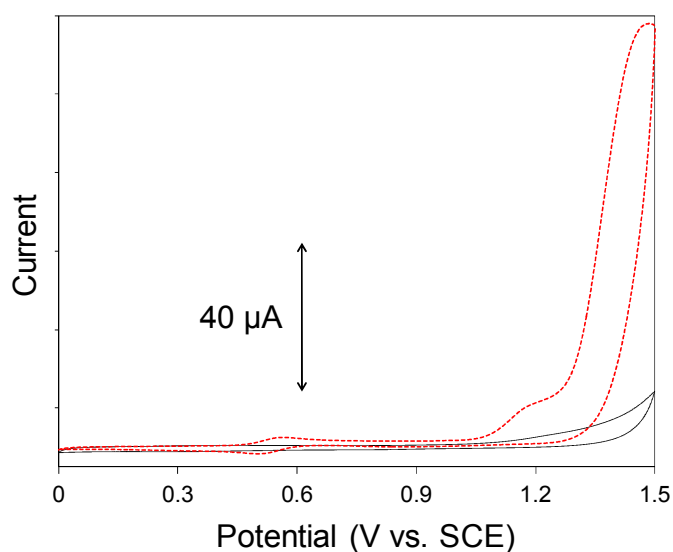

**Fig. S9** Cyclic voltammograms (0.5 mM) of **2** in an aqueous 1 N H<sub>2</sub>SO<sub>4</sub> solution (red dotted line) and blank solution (black line) under Ar atmosphere. (WE : GC, CE : Pt wire, RE : SCE ; Scan rate : 10 mV/s)
